# Supplementary material for: Distribution of Protein Precipitation Capacity within Variable Proanthocyanidin Fingerprints
Source: MDPI journal article supplement (doi:10.3390/molecules25215002), 2020-10-28
Supplement: s1 [file s1]

*Article*

# **Distribution of protein precipitation capacity within variable proanthocyanidin fingerprints**

**Milla Marleena Leppä<sup>1,\*</sup>, Juuso Erik Laitila<sup>1</sup> and Juha-Pekka Salminen<sup>1</sup>**

<sup>1</sup> Natural Chemistry Research Group, Department of Chemistry, University of Turku, Vatselankatu 2, FI-20014 Turku, Finland; [mimale@utu.fi](mailto:mimale@utu.fi)

\* Correspondence: [mimale@utu.fi](mailto:mimale@utu.fi)

**Table S1.** The plant species and tissues used in this study. The plant sources are similar as utilised in Leppä *et al.* [17].

| Plant species                              |                        | Semipreparative source material |                          |                           |
|--------------------------------------------|------------------------|---------------------------------|--------------------------|---------------------------|
| Latin name                                 | Plant tissue           | <sup>a</sup> mDP                | <sup>b</sup> PC/PD ratio | <sup>c</sup> EG (mol/mol) |
| <i>Aesculus hippocastanum</i> L.           | leaves                 | 4                               | 99/1                     | -                         |
| <i>Trifolium medium</i> L.                 | flowers                | 9                               | 99/1                     | -                         |
| <i>Rhododendron dichroanthum</i> Diels.    | leaves                 | 5                               | 79/21                    | 1.0                       |
| <i>Rhododendron schlippenbachii</i> Maxim. | leaves                 | 6                               | 78/22                    | 1.3                       |
| <i>Larix</i> sp                            | needles                | 12                              | 62/38                    | -                         |
| <i>Lotus corniculatus</i> L.               | green<br>brownish pods | 14                              | 45/55                    | -                         |
| <i>Lysimachia vulgaris</i> L.              | flowers                | 20                              | 27/73                    | -                         |
| <i>Pinus sylvestris</i> L.                 | needles                | 18                              | 24/76                    | -                         |
| <i>Salix phylicifolia</i> L.               | leaves                 | 20                              | 15/85                    | -                         |
| <i>Ribes alpinum</i> L.                    | leaves                 | 19                              | 3/97                     | -                         |
| <i>Trifolium repens</i> L.                 | flowers                | 18                              | 2/98                     | -                         |

<sup>b</sup>Mean degree of polymerization (mDP) and <sup>b</sup>ratio of procyanidin and prodelphinidin subunits (PC/PD) measured by UPLC-MS/MS [31]. <sup>c</sup>The estimate of the relative galloyl content to proanthocyanidin content.

**Table S1.** The non-standardised Partial Least Squares Regression coefficients of each plant species.

| Plant species             | Variable  | Non-standardized Regression coefficients | Plant species           | Variable  | Non-standardized Regression coefficients |
|---------------------------|-----------|------------------------------------------|-------------------------|-----------|------------------------------------------|
| <i>A. hippo-castanum</i>  | Intercept | −615.81                                  | <i>L. vulgaris</i>      | Intercept | −8467.20                                 |
|                           | $t_R$     | 262.16                                   |                         | $t_R$     | 1 489.18                                 |
|                           | mDP       | 166.94                                   |                         | mDP       | 358.43                                   |
|                           | PD-%      | 135.15                                   |                         | PD-%      | 60.38                                    |
| <i>T. medium</i>          | Intercept | −1 688.00                                | <i>P. sylvestris</i>    | Intercept | 3 059.66                                 |
|                           | $t_R$     | 527.58                                   |                         | $t_R^2$   | −78.51                                   |
|                           | mDP       | 155.63                                   |                         | $t_R$     | −521.90                                  |
|                           | PD-%      | 22.49                                    |                         | mDP       | 512.87                                   |
| <i>R. dichro-anthum</i>   | Intercept | −2 468.60                                | <i>S. phyllicifolia</i> | PD-%      | −43.16                                   |
|                           | $t_R^2$   | 50.85                                    |                         | Intercept | 7 605.46                                 |
|                           | $t_R$     | 359.30                                   |                         | $t_R^2$   | −4.99                                    |
|                           | mDP       | 233.20                                   |                         | $t_R$     | 50.58                                    |
|                           | PD-%      | 8.49                                     |                         | mDP       | 109.31                                   |
| <i>R. schlippenbachii</i> | EG        | −77.49                                   |                         | PD-%      | −69.79                                   |
|                           | Intercept | 1 403.34                                 | <i>R. alpinum</i>       | Intercept | 38432.80                                 |
|                           | $t_R$     | −266.09                                  |                         | $t_R^2$   | −28.88                                   |
|                           | mDP       | 172.89                                   |                         | $t_R$     | −66.94                                   |
|                           | PD-%      | 21.27                                    |                         | mDP       | 114.94                                   |
|                           | EG        | 140.09                                   |                         | PD-%      | −380.54                                  |
| <i>Larix</i> sp.          | Intercept | −1477.70                                 | <i>T. repens</i>        | Intercept | 2 276.75                                 |
|                           | $t_R$     | −35.96                                   |                         | $t_R^2$   | −122.33                                  |
|                           | mDP       | 296.12                                   |                         | $t_R$     | −413.05                                  |
|                           | PD-%      | 3.43                                     |                         | mDP       | 510.33                                   |
| <i>L. corniculatus</i>    | PD-%      | 50.40                                    |                         | PD-%      | −37.49                                   |
|                           | Intercept | −7 837.30                                |                         |           |                                          |
|                           | $t_R^2$   | 7.48                                     |                         |           |                                          |
|                           | $t_R$     | 219.88                                   |                         |           |                                          |
|                           | mDP       | 559.32                                   |                         |           |                                          |

Abbreviations used: mean degree of polymerization (mDP), retention time ( $t_R$ ), quadratic term of retention time ( $t_R^2$ ), proportion of prodelphinidin (PD-%) and the estimated galloyl content in relation to proanthocyanidin content (EG, mol/mol).

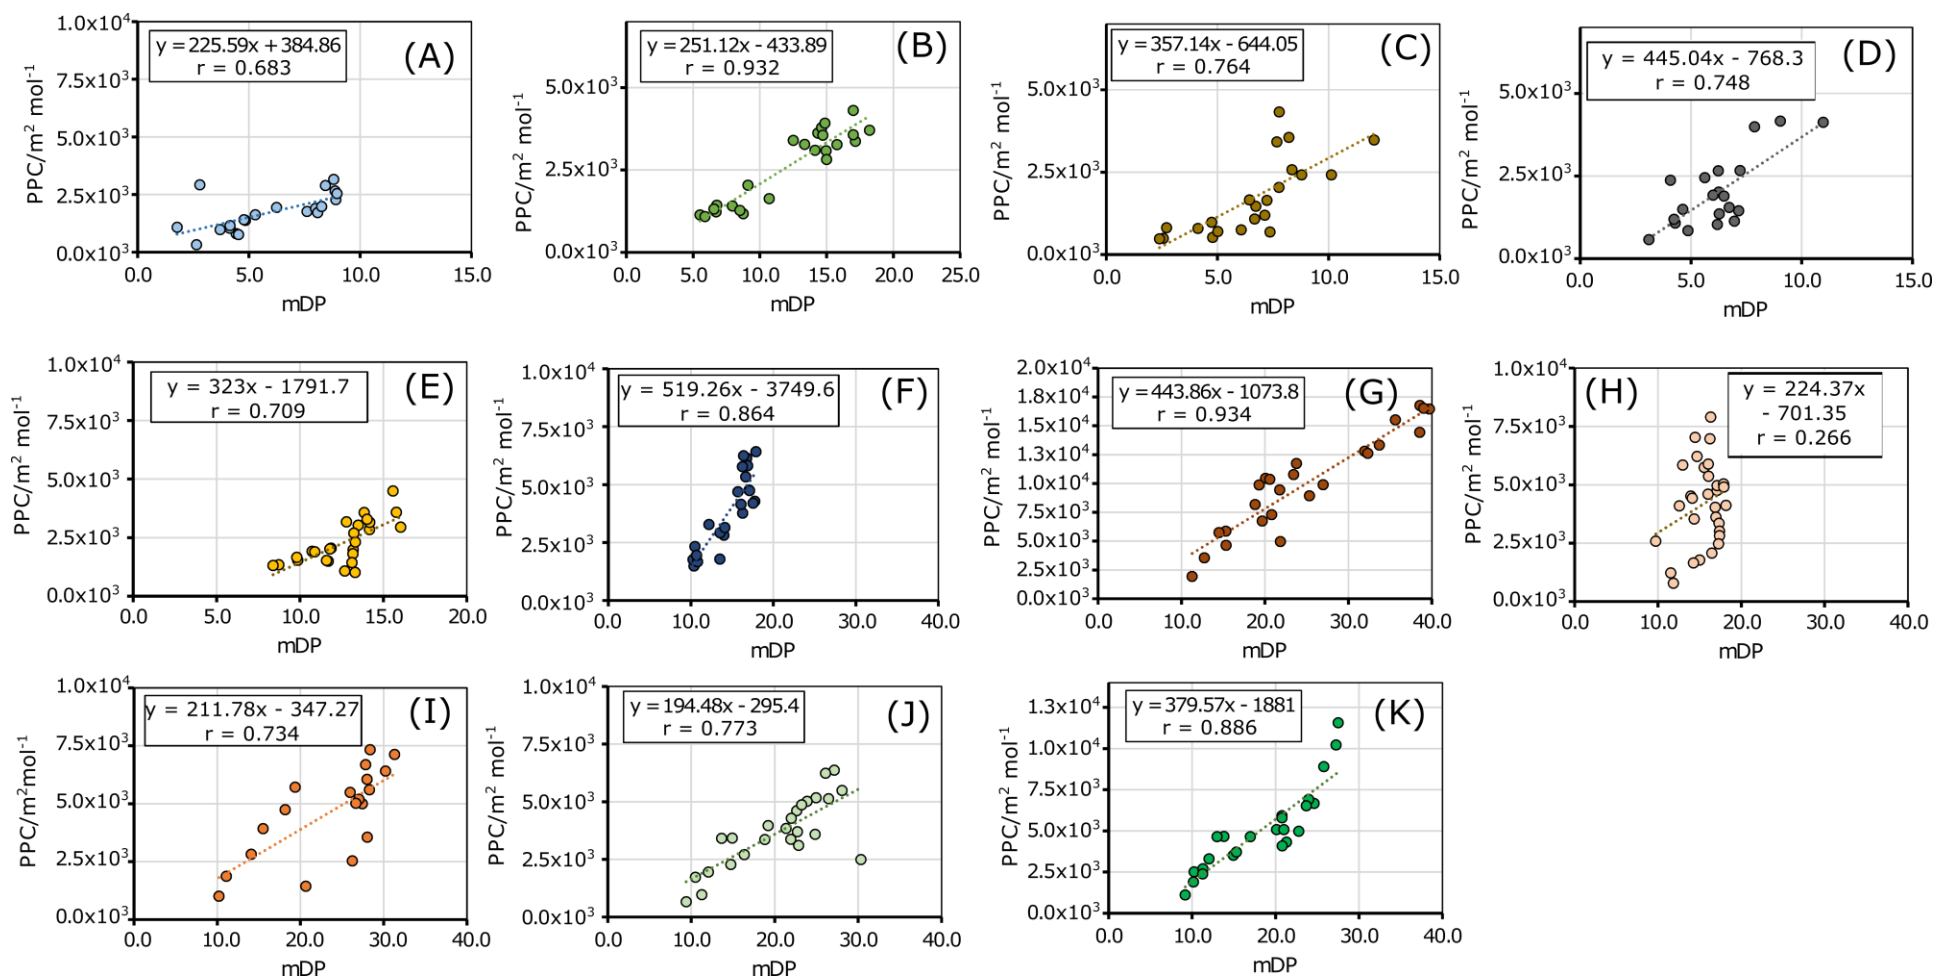

**Figure S1.** Protein precipitation capacity (PPC) as a function of mean degree of polymerization (mDP) of (A) *Aesculus hippocastanum*, (B) *Trifolium medium*, (C) *Rhododendron dichroanthum*, (D) *Rhododendron schlippenbachii*, (E) *Larix* sp, (F) *Lotus corniculatus*, (G) *Lysimachia vulgaris*, (H) *Pinus sylvestris*, (I) *Salix phylicifolia*, (J) *Ribes alpinum* and (K) *Trifolium repens*.

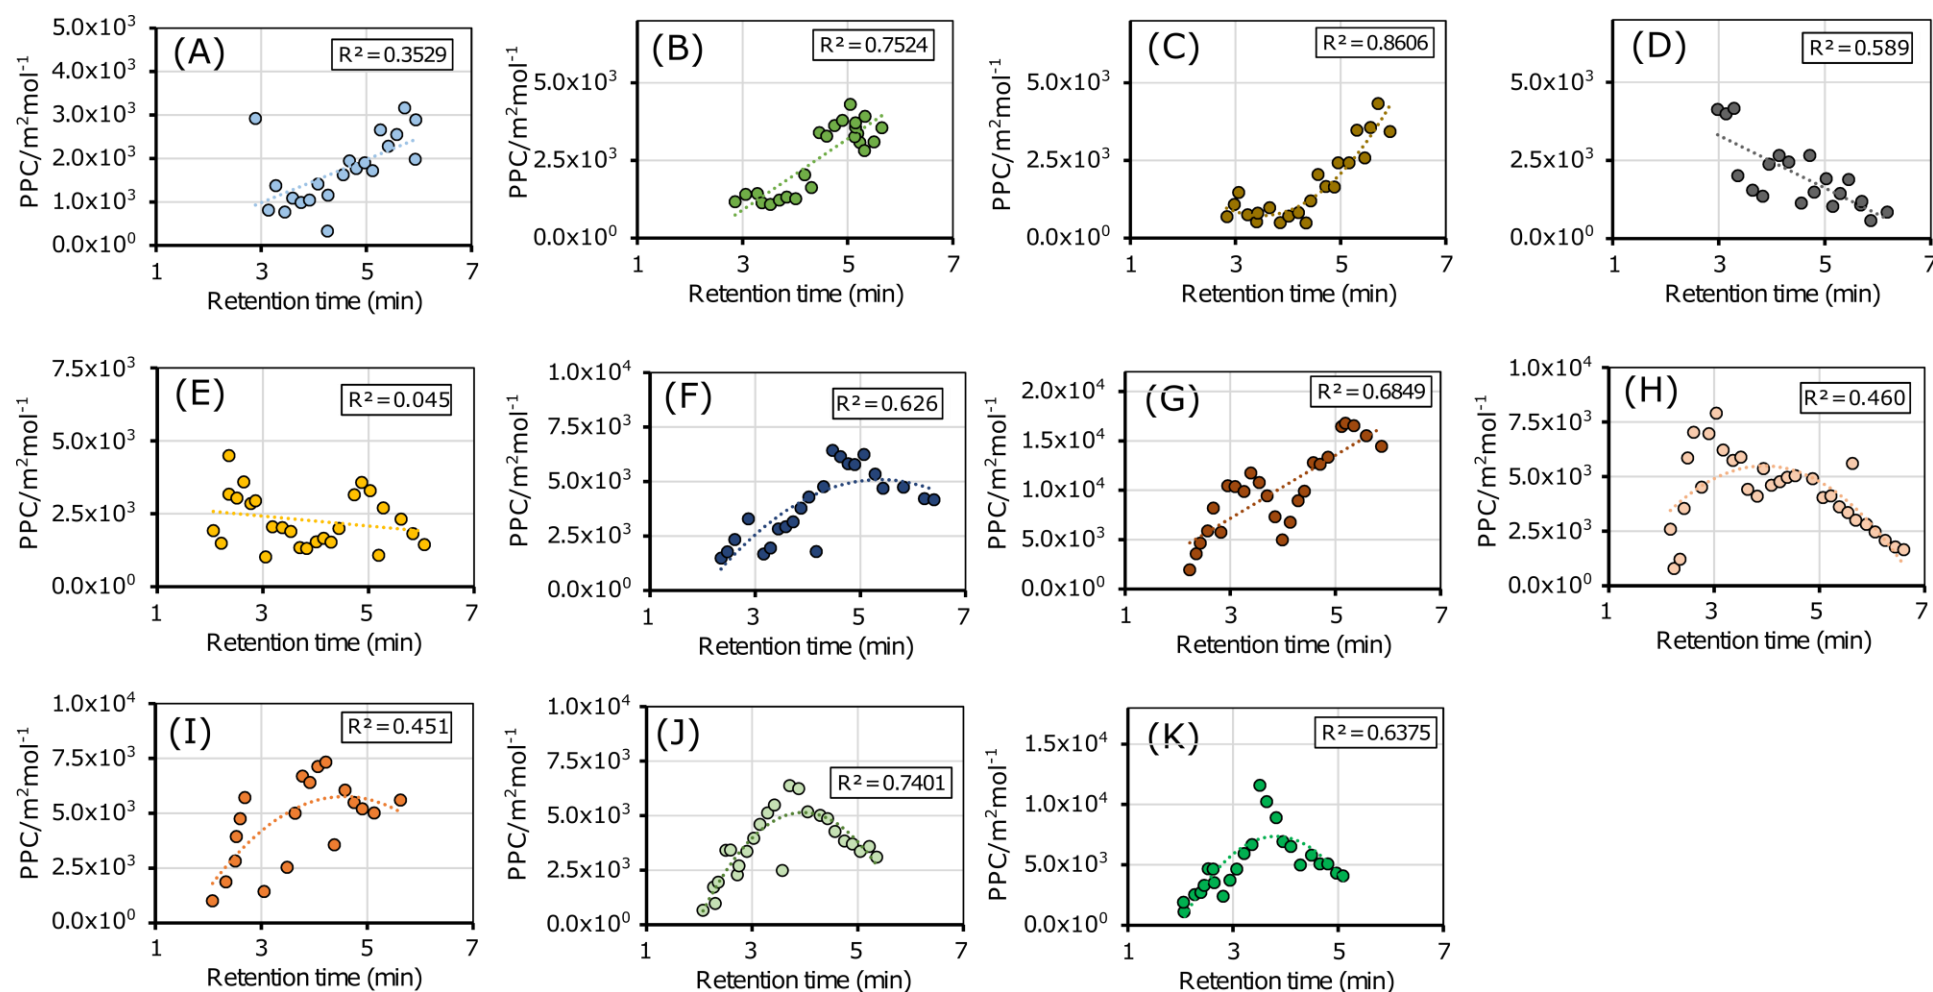

**Figure S2.** Protein precipitation capacity (PPC) as a function of retention time of (A) *Aesculus hippocastanum*, (B) *Trifolium medium*, (C) *Rhododendron dichroanthum*, (D) *Rhododendron schlippenbachii*, (E) *Larix* sp, (F) *Lotus corniculatus*, (G) *Lysimachia vulgaris*, (H) *Pinus sylvestris*, (I) *Salix phylicifolia*, (J) *Ribes alpinum* and (K) *Trifolium repens*.

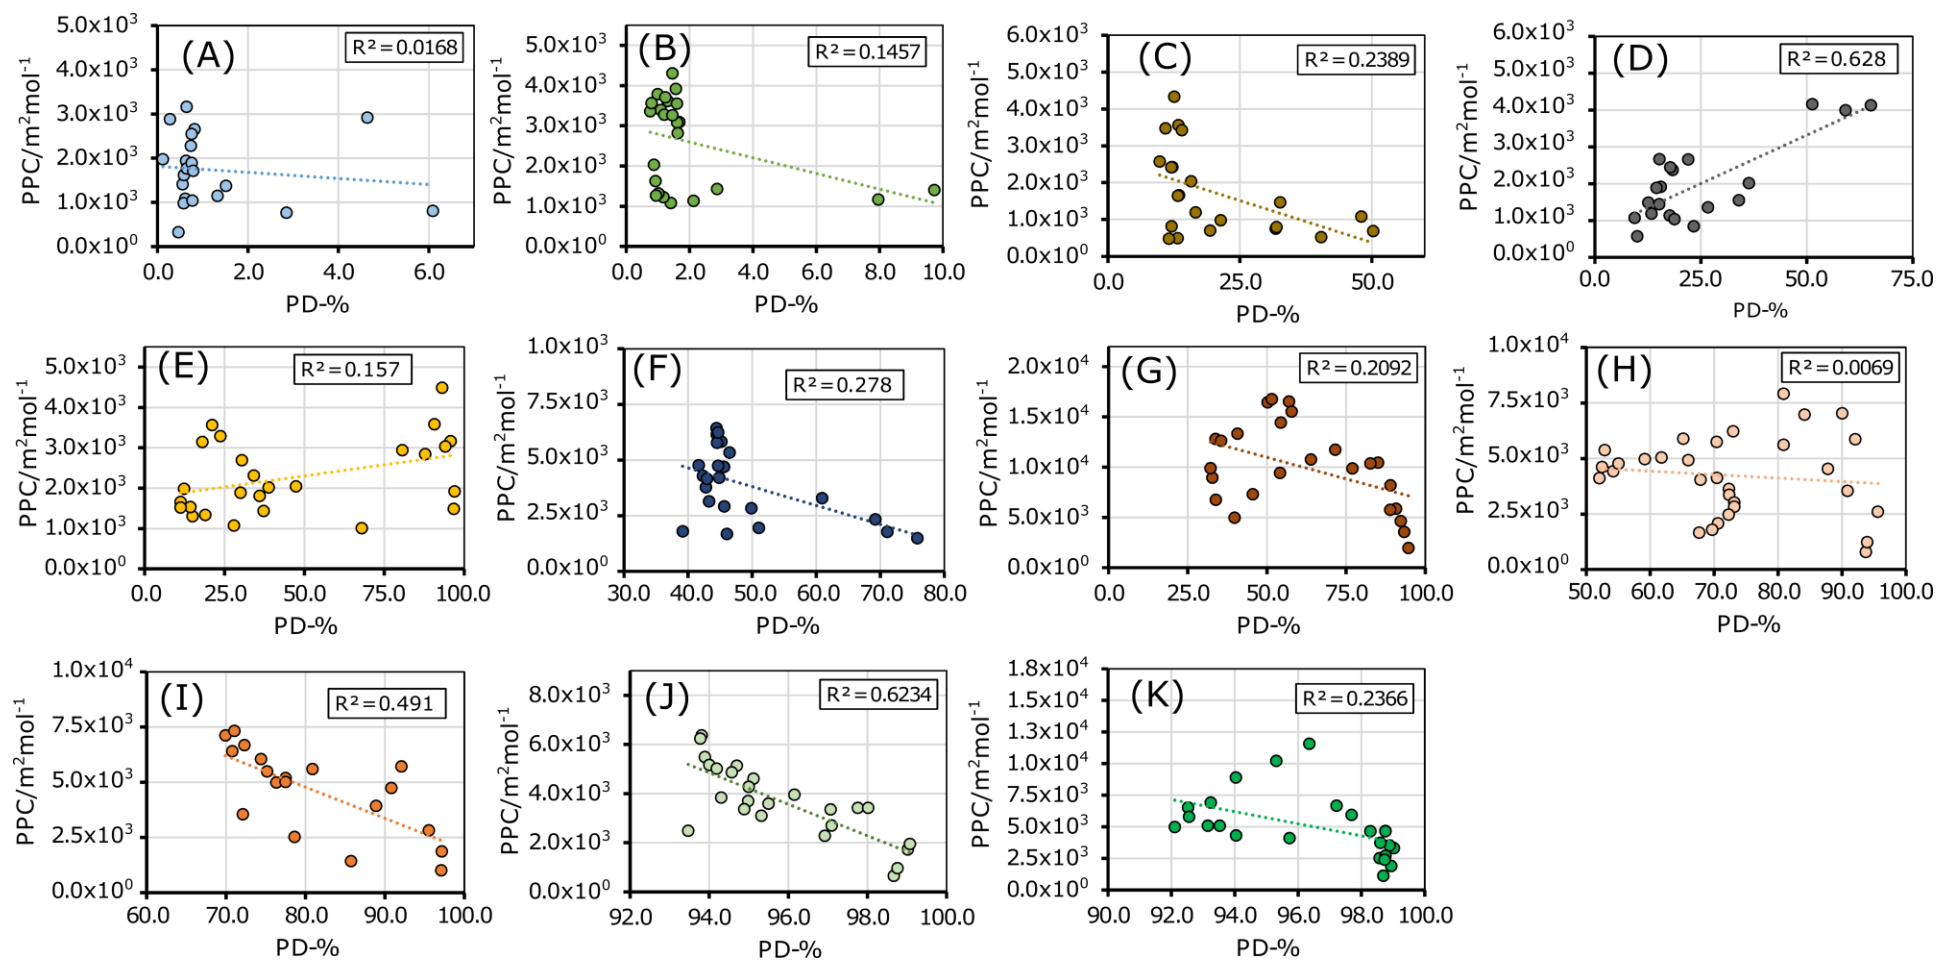

**Figure S3.** Protein precipitation capacity (PPC) as a function of prodelphinidin proportion (PD-%) of (A) *Aesculus hippocastanum*, (B) *Trifolium medium*, (C) *Rhododendron dichroanthum*, (D) *Rhododendron schlippenbachii*, (E) *Larix* sp, (F) *Lotus corniculatus*, (G) *Lysimachia vulgaris*, (H) *Pinus sylvestris*, (I) *Salix phylicifolia*, (J) *Ribes alpinum* and (K) *Trifolium repens*.

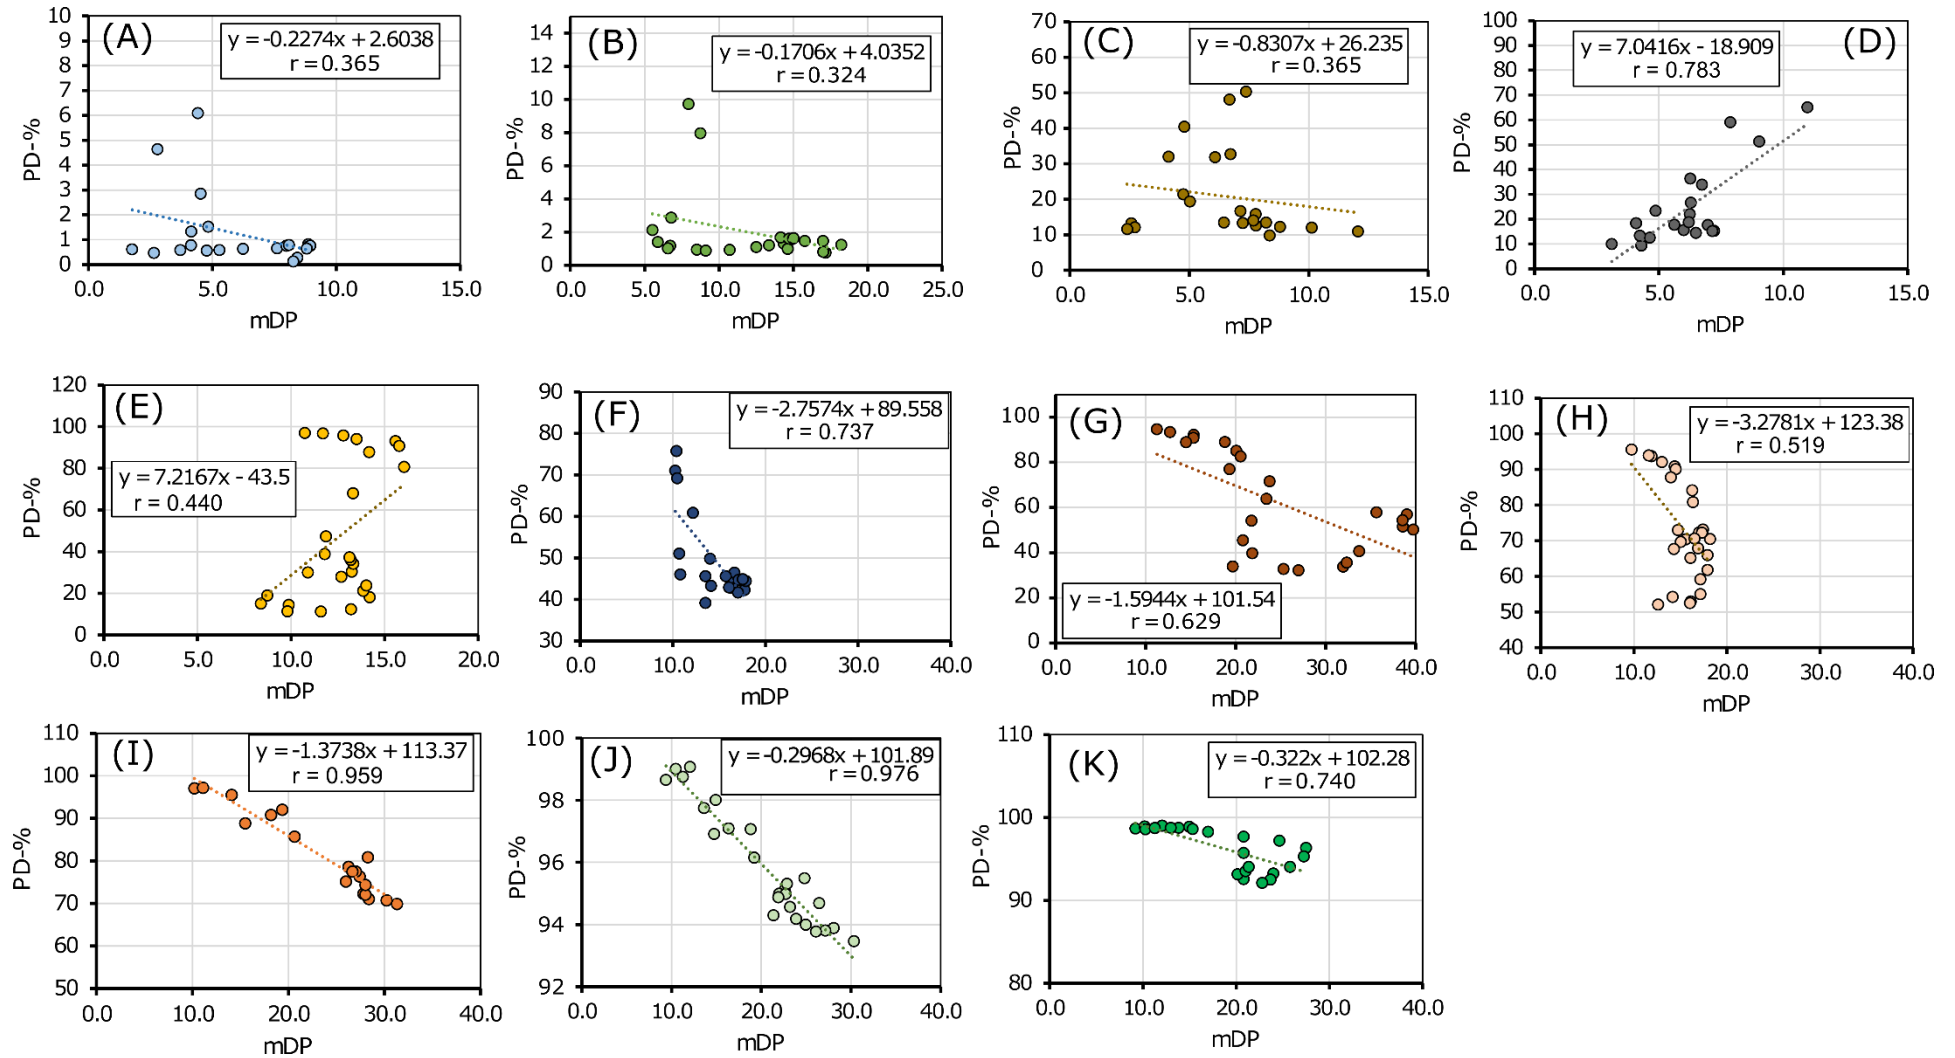

**Figure S4** Prodelphinidin proportion (PD-%) as a function of the mean degree of polymerization (mDP) of (A) *Aesculus hippocastanum*, (B) *Trifolium medium*, (C) *Rhododendron dichroanthum*, (D) *Rhododendron schlippenbachii*, (E) *Larix* sp, (F) *Lotus corniculatus*, (G) *Lysimachia vulgaris*, (H) *Pinus sylvestris*, (I) *Salix phylicofilia*, (J) *Ribes alpinum* and (K) *Trifolium repens*.

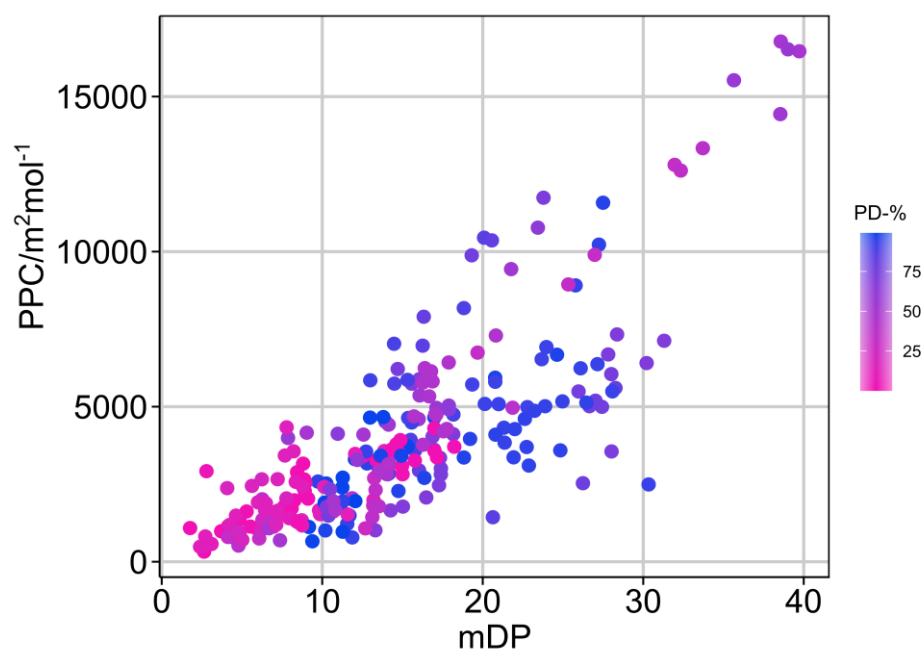

**Figure S5.** Protein precipitation capacity (PPC) as a function of the mDP. The colour gradient illustrates the PD-% of the fractions ranging from PC pure (pink) to PD pure (blue).

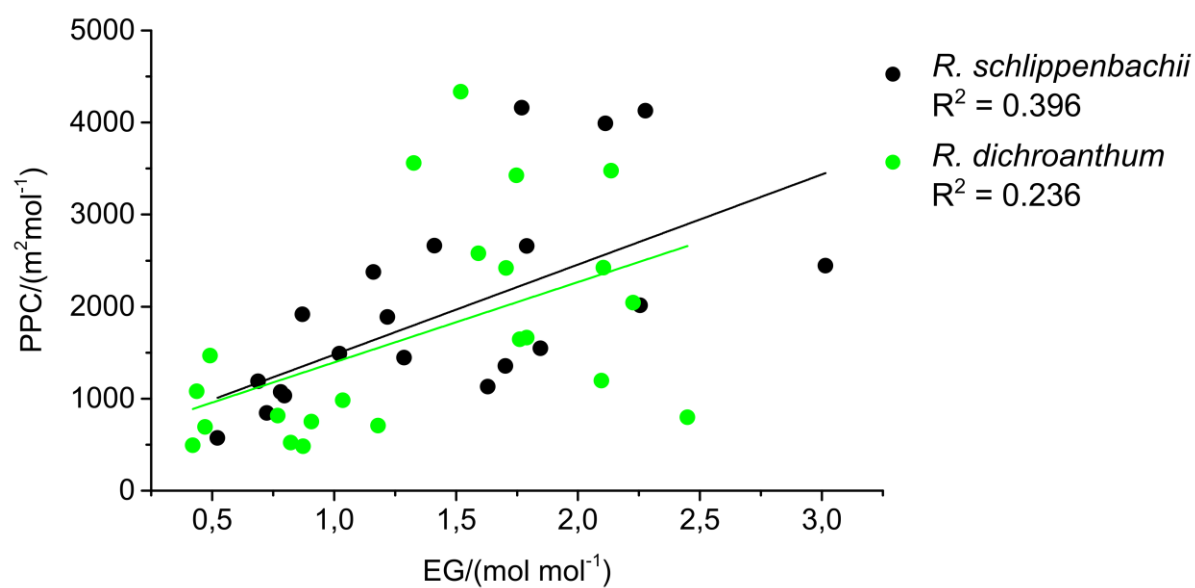

**Figure S6.** Protein precipitation capacity (PPC) as a function of the estimation of the relative galloyl content (EG).



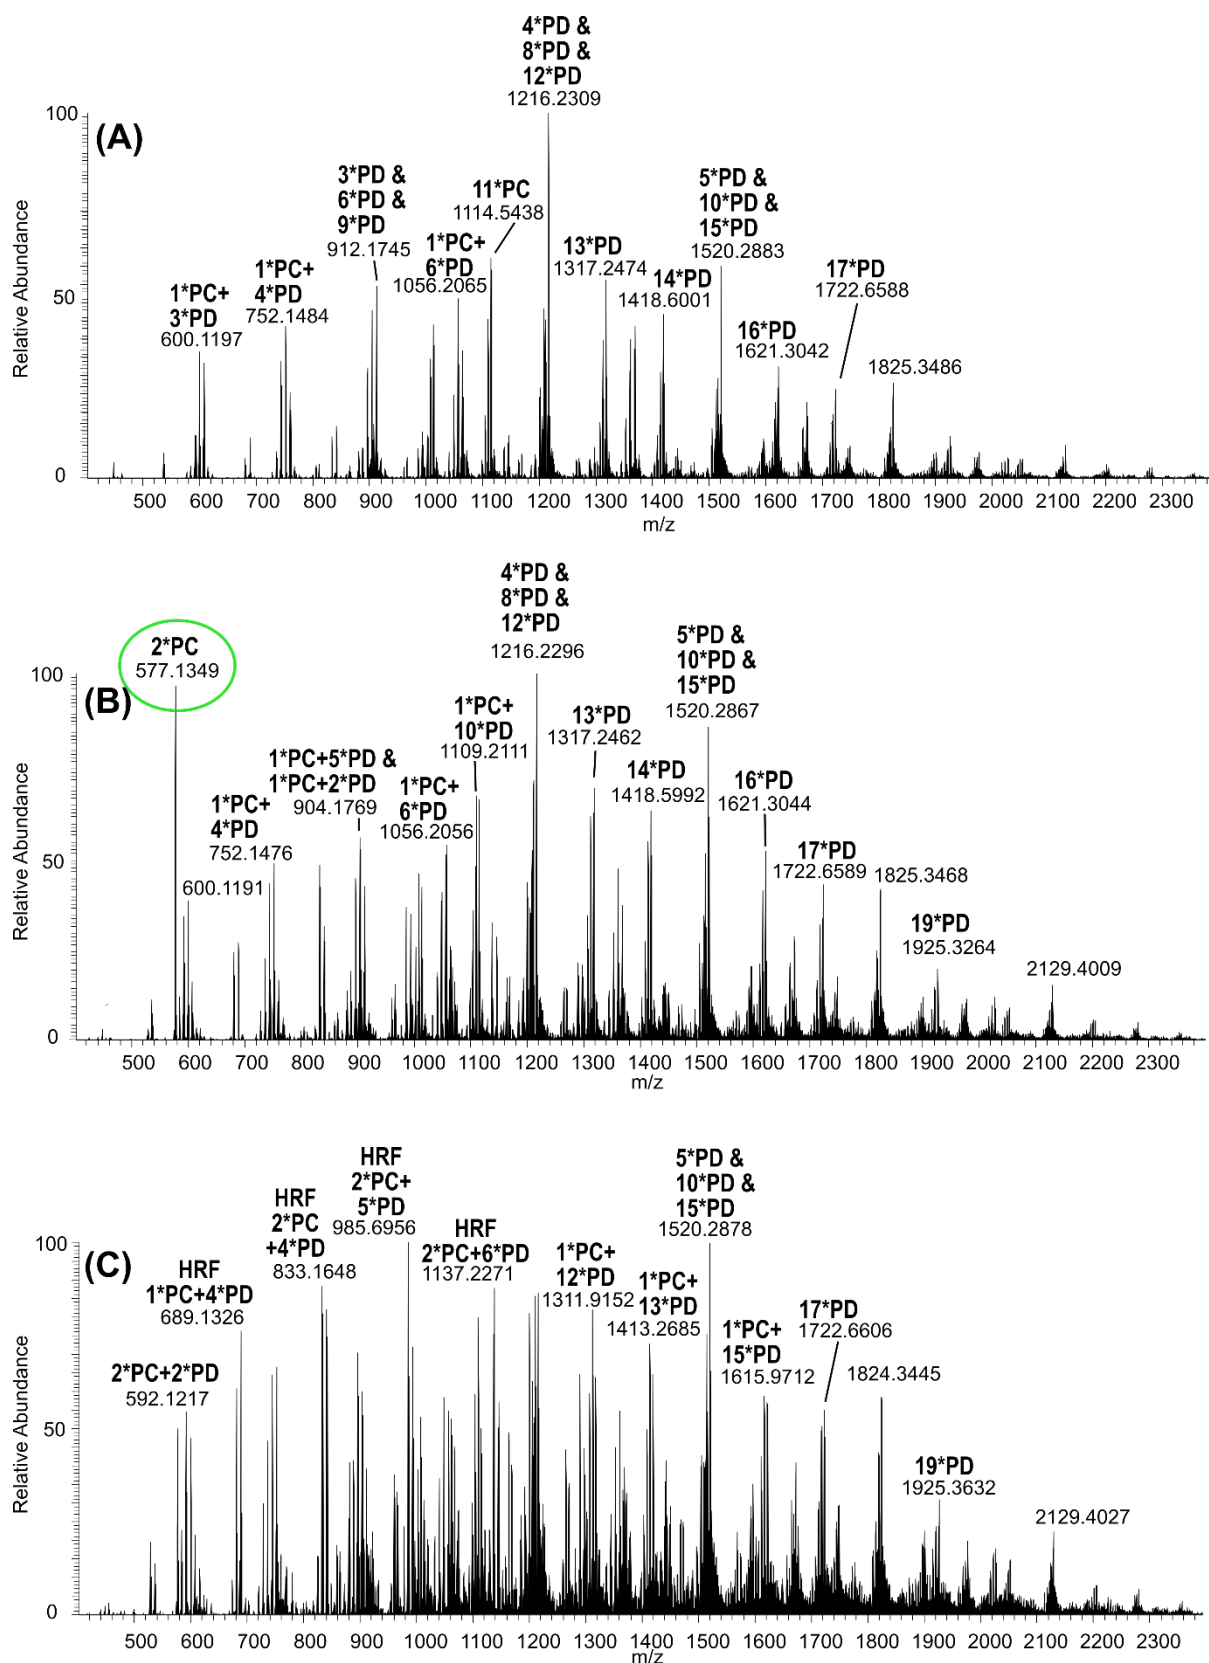

**Figure S7.** High-resolution mass spectra of *Ribes alpinum* semipreparative fraction numbers (A) 64, (B) 68 and (C) 72. Compound interpretations are presented above each signal. For instance “2\*PC+2\*PD” means a tetrameric proanthocyanidin consisting from two procyanidin units and two prodelphinidin units. All identified compounds were B-type proanthocyanidins consisting from procyanidins and prodelphinidins. The used abbreviations are as follows: PC = procyanidin, PD = prodelphinidin, HRF = heterocyclic ring fission.
